# Supplementary material for: Oyster Hydrolysates Attenuate Muscle Atrophy via Regulating Protein Turnover and Mitochondria Biogenesis in C2C12 Cell and Immobilized Mice
Source: MDPI journal article supplement (doi:10.3390/nu13124385), 2021-12-08
Supplement: s1 [file s1]

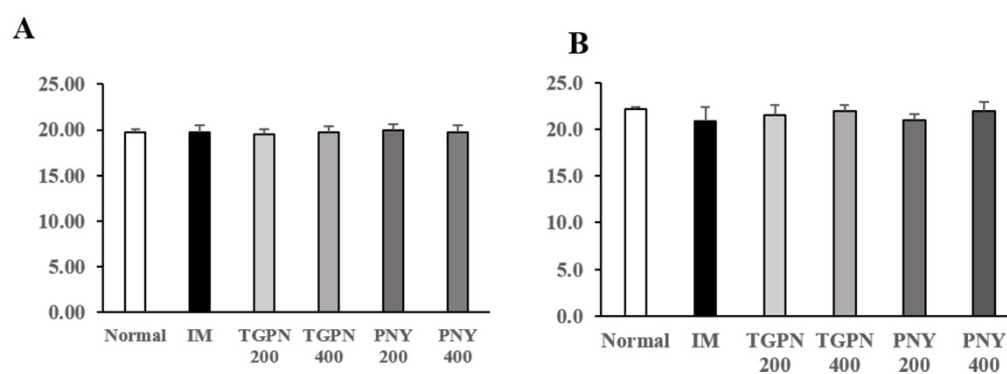

**Supplementary Figure S1.** Body weight.

(A) Body weight before the start of the administration. (B) Body weight at the end of the experiment.
